# Supplementary material
Source: Elsevier journal article supplement (https://www.sciencedirect.com/science/article/pii/S1517838217307815)
Supplement: mmc1 [file S1517838217307815:mmc1.doc]

Table S1 GenBank accession numbers of the genes that were amplified, sequenced and used in MLSA analysis.

|  | ***aroE*** | ***glnS*** | ***gyrB*** | ***ileS*** | ***rpoD*** | ***16S*** |
| --- | --- | --- | --- | --- | --- | --- |
| IB20 | KX779045.1 | KX831431.1 | KX831482.1 | KX831433.1 | KX831440.1 | KT377042.1 |
| 12B3 | KX831434.1 | KX831435.1 | KX831436.1 | KX831437.1 | KX831438.1 | KT377041.1 |
| 6A1 | KT820723.1 | KT820724.1 | KT820725.1 | KT820726.1 | KT820727.1 | KT377040.1 |
| KG01* | LFMW00000000 | LFMW00000000 | LFMW00000000 | LFMW00000000 | LFMW00000000 | LFMW00000000 |
